# Supplementary material
Source: publisher site journal article supplement (https://www.kjim.org/upload/media/kjim-2022-084_suppl1.pdf)
Supplement: Supplementary file 1 [file kjim-2022-084_suppl1.pdf]

**Supplementary Table 1. Diagnostic criteria for infections**

| Infection                                                                                                                                                                                  | Site of culture                                                                                                      | Clinical signs                                                                                                                                                       | Also                                                                                                                                                                                                              |
|--------------------------------------------------------------------------------------------------------------------------------------------------------------------------------------------|----------------------------------------------------------------------------------------------------------------------|----------------------------------------------------------------------------------------------------------------------------------------------------------------------|-------------------------------------------------------------------------------------------------------------------------------------------------------------------------------------------------------------------|
| Blood stream infection (BSI)                                                                                                                                                               | At least 2 sets of blood cultures from separate peripheral vein                                                      | Fever/tachycardia/hypotension<br>+<br>No further sign of localized infection                                                                                         |                                                                                                                                                                                                                   |
| Central line-associated blood stream infection (CLABSI)                                                                                                                                    | 2 Sets of blood cultures from catheters and peripheral vein                                                          | Fever/tachycardia/hypotension<br>+<br>Exclusion of alternate sources of infection                                                                                    | Catheter-related BSI was defined as a case in which bacteria were detected more than 2 hours earlier than percutaneous blood samples in catheter-related samples.                                                 |
| Coagulase-negative staphylococci were considered to be infectious pathogens when confirmed three or more times in culture.                                                                 |                                                                                                                      |                                                                                                                                                                      |                                                                                                                                                                                                                   |
| Hospital acquired pneumonia (HAP) or ventilator associated pneumonia (VAP)                                                                                                                 | Sputum culture<br>Or<br>Bronchoalveolar lavage/endotracheal aspirate culture<br>And/or<br>Pneumonia PCR <sup>a</sup> | At least 2 of 3 clinical features: fever, leukocytosis/leukopenia, purulent secretions<br>+<br>New/progressive radiographic infiltrate<br>+<br>Worsening oxygenation | HAP: Pneumonia presents clinically 2 or more days after hospitalization.<br>VAP: VAP is defined as pneumonia occurring more than 48 hours after patients have been intubated and received mechanical ventilation. |
| Excluded organisms: "Normal respiratory flora," "normal oral flora," "mixed respiratory flora," <i>Candida</i> spp., <i>Staphylococcus</i> spp., and <i>Enterococcus</i> spp.              |                                                                                                                      |                                                                                                                                                                      |                                                                                                                                                                                                                   |
| Catheter associated urinary tract infection (CAUTI)                                                                                                                                        | Urine culture                                                                                                        | Fever/tachycardia/hypotension                                                                                                                                        | Excluded organisms: "mixed flora," coagulase-negative staphylococci, <i>Candida</i> spp.                                                                                                                          |
| Any relevant culture sample and pneumonia PCR which caused antibiotic therapy initiation or changing (obtained within 72 hours before or 24 hours after antibiotic starting/modification). |                                                                                                                      |                                                                                                                                                                      |                                                                                                                                                                                                                   |

PCR, polymerase chain reaction.

<sup>a</sup>In hospitals where sputum culture cannot be performed, diagnosis is made based on pneumonia PCR and clinical status.
